# Supplementary material
Source: publisher figshare collection journal article supplement (https://tandf.figshare.com/ndownloader/files/15572198)
Supplement: Supplementary file 1 [file 15572198]

**Supplimentary content**

**EXPERIMENTAL**

Melting points were recorded in open capillaries with super fit melting point apparatus and were uncorrected. 1H NMR spectra were recorded on 300 MHz Bruker FT-NMR spectrometer using tetramethylsilane as an internal standard, chemical shifts are reported in δ units and the coupling constant (*J*) are reported in hertz. Mass spectra were recorded on Bruker Daltonics Data Analysis 3.4. All chromatographic purification were performed with silica gel (100-200 mesh), using petroleum ether/ethyl acetate (9:1) as an eluent, whereas all TLC developments were performed on silica gel (Merck Kiesel 60F254, 0.2 mm thickness) sheets. All reagents and solvents purchased from Aldrich with high grade quality and used without any further purification. All yields refer to isolated products.

**General procedure for the synthesis of pyrimidinone/thione derivatives.**

The aromatic aldehyde **1** (2 mmol), cyclopentanone **2** (1 mmol), urea/thiourea **3** (1.2 mmol) and cyanuric chloride (5 mol %) in acetonitrile (10 mL) was stirred at room temperature for 2-3 h. After completion of the reaction (TLC analysis), it was diluted with water (10 mL) and extracted with dichloromethane (15 mL). The organic layer was dried over anhydrous Na2SO4, evaporated and purified by chromatography by using chloroform to give the products in yields.

*(7E)-7-Benzylidene-3,4,6,7-tetrahydro-4-phenyl-1H-cyclopenta[d]pyrimidin-2(5H)-one* (**4a**): M. p. 236-239 °C; 1H NMR (CDCl3, 300 MHz): *δ*H 8.79 (s, 1H), 7.40 (m, 10H), 6.63 (s, 1H), 5.15 (s, 1H), 2.89 (m, 2H), 2.49 (m, 1H), 2.02 (s, 1H). IR (KBr): *ν* 3389, 3156, 3006, 2994, 2892, 1687, 1558, 1508, 1462, 851 cm1. 13C NMR (75 MHz, CDCl3): 150.6, 143.5, 139.4, 135.7, 128.9, 128.3, 128.4, 127.3, 126.2, 124.4, 59.5, 28.6, 22.3. MS (ESI, m/z): (M+ H)+, 303 (100).

*(7E)-7-(4-Methylbenzylidene)-3,4,6,7-tetrahydro-4-(4-methylphenyl)-1H-cyclo penta[d] pyrimidin-2(5H)-one* (**4b**): M. p. 238-241 °C; 1H NMR (CDCl3, 300 MHz): *δ*H 8.73 (s, 1H), 7.20 (m, 8H), 6.56 (s, 1H), 5.07 (s, 1H), 2.85 (m, 2H), 2.34 (m, 2H), 2.28 (s, 6H), 2.00 (s, 1H). IR (KBr): *ν* 3379, 3114, 3007, 2991, 2879, 1681, 1562, 1512, 1442, 848 cm1. 13C NMR (75 MHz, CDCl3): 150.8, 140.7, 139.4, 137.1, 136.2, 132.2, 129.3, 128.4, 128.3, 127.3, 126.2, 124.4, 115.1, 59.5, 28.5, 24.6. MS (ESI, m/z): (M+ H)+, 331 (100).

*(7E)-7-(4-Methoxybenzylidene)-3,4,6,7-tetrahydro-4-(4-methoxyphenyl)-1H- cyclopenta[d]pyrimidin-2(5H)-one* (**4c**): M. p. 250-252 °C; 1H NMR (CDCl3, 300 MHz): *δ*H 8.78 (s, 1H), 7.26 (m, 4H), 7.19 (m, 5H), 6.69 (s, 1H), 5.49 (s, 1H), 3.79 (s, 3H), 3.78 (s, 3H), 2.68 (m, 2H), 2.32 (m, 1H), 1.97 (s, 1H). IR (KBr): *ν* 3384, 3112, 3009, 2989, 2868, 1692, 1567, 1549, 1431, 878 cm1. 13C NMR (75 MHz, CDCl3): 159.4, 150.6, 140.3, 135.1, 132.2, 128.3, 128.1, 127.1, 124,3, 114.4, 59.6, 56.3. 28.4, 22.3. MS (ESI, m/z): (M+H)+, 363 (100).

*(7E)-7-(4-Chlorobenzylidene)-4-(4-chlorophenyl)-3,4,6,7-tetrahydro-1H-cyclo penta[d]pyrimidin-2(5H)-one* (**4d**): M. p. 252-255 °C; 1H NMR (CDCl3, 300 MHz): *δ*H 8.81 (s, 1H), 7.36 (m, 8H), 6.62 (s, 1H), 5.18 (s, 1H), 2.78 (m, 2H), 2.38 (m, 2H), 2.01 (s, 1H). IR (KBr): *ν* 3385, 3120, 3001, 2985, 2853, 1692, 1568, 1527, 1428, 841 cm1. 13C NMR (75 MHz, CDCl3): 150.2, 141.5, 140.2, 133.5, 133.2, 128.5, 128.3, 128.1, 127.7, 115.8, 59.4, 28.5, 22.4. MS (ESI, m/z): (M+ H)+, 372 (100).

*(7E)-7-(3-Nitrobenzylidene)-3,4,6,7-tetrahydro-4-(3-nitrophenyl)-1H-cyclopenta [d]pyrimidin-2(5H)-one* (**4e**): M. p. 235-239 °C; 1H NMR (CDCl3, 300 MHz): *δ*H 8.89 (s, 1H), 8.16 (m, 4 H), 7.74 (m, 5H), 6.81 (s, 1H), 5.45 (s, 1H), 2.83 (m, 2H), 2.48 (m, 2H), 2.03 (s, 1H). IR (KBr): *ν* 3242, 3112, 3086, 2935, 2864, 1680, 1475, 1458, 750 cm1. MS (ESI, m/z): (M+H)+, 393 (100).

*(7E)-7-(2-Fluorobenzylidene)-4-(2-fluorophenyl)-3,4,6,7-tetrahydro-1H-cyclo penta[d]pyrimidin-2(5H)-one* (**4f**): M. p. 241-244 °C; 1H NMR (CDCl3, 300 MHz): *δ*H 9.05 (s, 1H), 7.33 (m, 2H), 7.16 (m, 6H), 6.72 (s, 1H), 5.45 (s, 1H), 2.71 (m, 2H), 2.39 (s, 1H), 2.06-1.98 (m, 1H). IR (KBr): *ν* 3389, 3106, 3006, 1681, 1561, 1568, 1421, 851 cm1. MS (ESI, m/z): (M+ H)+, 339 (100).

*(7E)-7-(2-Chlorobenzylidene)-4-(2-chlorophenyl)-3,4,6,7-tetrahydro-1H-cyclo penta[d]pyrimidin-2(5H)-one* (**4g**): M. p. 232-234 °C; 1H NMR (CDCl3, 300 MHz): *δ*H 9.15 (s, 1H), 7.43 (m, 8H), 6.78 (s, 1H), 5.62 (s, 1H), 2.87 (m, 2H), 2.42 (m, 2H), 1.98 (s, 1H). IR (KBr): *ν* 3342, 3116, 3079, 2968, 2894, 1684, 1456, 1434, 758 cm1; 13C NMR (75 MHz, CDCl3): 150.5, 142.5, 140.4, 133.3, 132.5 131.4, 128.6, 128.4, 128.1, 127.6, 126.2, 115.9, 50.2, 28.5, 22.2. MS (ESI, m/z): (M+H)+, 372 (100).

*(7E)-7-(2-Bromobenzylidene)-4-(2-bromophenyl)-3,4,6,7-tetrahydro-1H-cyclo penta[d]pyrimidin-2(5H)-one* (**4h**): M. p. 242-246 °C; 1H NMR (CDCl3, 300 MHz): *δ*H 9.17 (s, 1H), 7.51 (m, 8H), 6.70 (s, 1H), 5.58 (s, 1H), 2.67 (m, 2H), 2.42 (m, 2H), 1.96 (s, 1H). IR (KBr): *ν* 3368, 3161, 3031, 2978, 2894, 1682, 1567, 1549, 1421, 856 cm1. MS (ESI, m/z): (M+H)+, 462 (100).

*(7E)-7-(4-Fluorobenzylidene)-4-(4-fluorophenyl)-3,4,6,7-tetrahydro-1H-cyclo penta[d]pyrimidin-2(5H)-one* (**4i**): M. p. 203-205 °C; 1H NMR (CDCl3, 300 MHz): *δ*H 10.07 (s, 1H), 8.98 (s, 8H), 6.91 (s, 1H), 5.19 (s, 1H), 2.84 (m, 2H), 2.43 (m, 2H), 2.04 (s, 1H). IR (KBr): *ν* 3239, 3142, 3088, 2989, 2876, 1682, 1470, 1426, 754 cm1. MS (ESI, m/z): (M+ H)+, 339 (100).

*(7E)-7-(4-Nitrobenzylidene)-3,4,6,7-tetrahydro-4-(4-nitrophenyl)-1H-cyclo penta[d]pyrimidin-2(5H)-one* (**4j**): M. p. 192-195 oC, 1H NMR (CDCl3, 300 MHz): *δ*H 9.05 (s, 1H), 7.36 (m, 8H), 6.92 (s, 1H), 5.25 (s, 1H), 2.84 (m, 2H), 2.41 (m, 1H), 2.03 (s, 1H). IR (KBr): *ν* 3246, 3176, 3025, 2984, 2878, 1684, 1568, 1530, 1428, 871 cm1. 13C NMR (75 MHz, CDCl3): 150.5, 149.7, 146.8, 141.3, 140.3, 128.5, 127.6, 124.2, 120.6, 115.8, 59.5, 28.4, 22.5. MS (ESI, m/z): (M+H)+, 392 (100).

*(7E)-7-Benzylidene-3,4,6,7-tetrahydro-4-phenyl-1H-cyclopenta[d]pyrimidin-2 (5H)-thione* (**4k**): M. p. 219-223 °C; 1H NMR (CDCl3, 300 MHz): *δ*H 8.76 (s, 1H), 7.32 (m, 10H), 6.62 (s, 1H), 5.12 (s, 1H), 2.89 (m, 2H), 2.49 (m, 1H), 2.02 (s, 1H). IR (KBr): *ν* 3376, 3145, 3010, 2981, 2823, 1683, 1568, 1534, 1422, 820 cm1. 13C NMR (75 MHz, CDCl3): 180.6, 141.6, 143.4, 139.2, 135.5, 128.5, 128.3, 127.3, 126.6, 65.2, 28.3, 23.2. MS (ESI, m/z): (M+H)+, 318 (100).

*(7E)-7-(4-Chlorobenzylidene)-4-(4-chlorophenyl)-3,4,6,7-tetrahydro-1H-cyclo penta[d]pyrimidin-2(5H)-thione* (**4l**): M. p. 226-228 °C; 1H NMR (CDCl3, 300 MHz): *δ*H 9.06 (s, 1H), 8.69 (m, 8H), 6.92 (s, 1H), 5.49 (s, 1H), 2.68 (m, 2H), 2.40 (m, 2H), 2.07 (s, 1H); IR (KBr): *ν* 3269, 3126, 3041, 2984, 2872, 1678, 1472, 1416, 762 cm1. MS (ESI, m/z): (M+H)+, 388 (100).

*(7E)-7-(4-Nitrobenzylidene)-4-(4-nitrophenyl)-3,4,6,7-tetrahydro-1H-cyclo penta[d]pyrimidin-2(5H)-thione* (**4m**): M. p. 203-207 °C; 1H NMR (CDCl3, 300 MHz): *δ*H 8.80 (s, 1H), 7.34 (m, 8H), 6.64 (s, 1H), 5.19 (s, 1H), 2.70 (m, 2H), 2.41 (m, 2H), 2.02 (s, 1H). IR (KBr): *ν* 3254, 3133, 3084, 2976, 2870, 1687, 1468, 1420, 752 cm1. MS (ESI, m/z): (M+H)+, 409 (100).

*(7E)-7-(2-Nitrobenzylidene)-3,4,6,7-tetrahydro-4-(2-nitrophenyl)-1H-cyclo penta[d]pyrimidin-2(5H)-thione* (**4n**): M. p. 250-251 oC; 1H NMR (CDCl3, 300 MHz): *δ*H 8.76 (s, 1H), 7.34 (m, 8H), 6.64 (s, 1H), 5.49 (s, 1H), 3.80 (s, 3H ), 3.78 (s, 3H), 2.76 (m, 2H), 2.03 (m, 2H), 2.02 (s, 1H). IR (KBr): *ν* 3271, 3117, 3016, 2940, 2839, 1682, 1597, 1497, 1458, 1242, 1026, 748 cm1. MS (ESI, m/z): (M+H)+, 379 (100).
